# Supplementary material for: Evolution of splicing regulatory networks in Drosophila
Source: HighWire-hosted journal article supplement (doi:10.1101/gr.161521.113), 2014-02-10
Supplement: Supplemental_TableS1.pdf [file Supplemental_TableS1.pdf]

**Table S1. Genome resequencing coverage of Drosophila strains and species**

| Strain                              | Total Reads | Mapped Reads | Coverage | SNPs and indels modified | New sequence added |
|-------------------------------------|-------------|--------------|----------|--------------------------|--------------------|
| <i>D. mel zhr*</i>                  | 69,794,712  | 66,705,080   | 30.04    | 659,661                  | NA                 |
| <i>D. mel z30*</i>                  | 51,969,198  | 49,523,960   | 22.31    | 1,142,005                | NA                 |
| <i>D. sim<br/>tsimbazaza</i>        | 63,719,674  | 61,579,018   | 30.18    | 1,369,487                | 12,633,195         |
| <i>D. sechellia<br/>(reference)</i> | 55,413,474  | 50,308,326   | 22.73    | 56,067                   | 1,614,249          |

\* Genomes from these strains were reported in Coolon *eg al.*, 2012.
